# Supplementary material for: Pharmacokinetic and Metabolic Profile of Deutetrabenazine (TEV‐50717) Compared With Tetrabenazine in Healthy Volunteers
Source: PubMed Central journal article supplement — Clin Transl Sci. 2020 Mar 10;13(4):707–17. doi: 10.1111/cts.12754 (PMC7359938; doi:10.1111/cts.12754), 2020-03-10

## Supplemental Materials

Table S1. Pharmacokinetic parameters for deutetrabenazine and tetrabenazine and their active metabolites in Study AUS-SD-809-CTP-06 (secondary pharmacokinetic analysis including all evaluable subjects).

| All Evaluable Subjects (n = 19) |                         |                           |                        |                       |                  |                  |
|---------------------------------|-------------------------|---------------------------|------------------------|-----------------------|------------------|------------------|
| Analyte Name                    | Parameter Mean (%CV)    | Deutetrabenazine (n = 19) | Tetrabenazine (n = 19) | Ratio of LS Means (%) | Lower 95% CL (%) | Upper 95% CL (%) |
| $\alpha$ -HTBZ                  | $C_{max}$ (ng/mL)       | 46.1 (30.4)               | 41.2 (36.0)            | 113.7                 | 100.0            | 129.3            |
|                                 | $AUC_{0-t}$ (h*ng/mL)   | 362.0 (40.1)              | 161.9 (60.5)           | 214.8                 | 195.1            | 236.7            |
|                                 | $AUC_{0-inf}$ (h*ng/mL) | 373 (39.3)                | 189 (59.2)             | 213.6                 | 194.0            | 235.0            |
|                                 | $t_{1/2}$ (h)           | 8.97 (34.7)               | 5.47 (51.4)            | 174.7                 | 156.5            | 195.0            |
| $\beta$ -HTBZ                   | $C_{max}$ (ng/mL)       | 29.6 (49.4)               | 20.5 (51.5)            | 145.8                 | 126.2            | 168.5            |
|                                 | $AUC_{0-t}$ (h*ng/mL)   | 164.3 (94.7)              | 70.7 (101.3)           | 240.1                 | 219.9            | 262.2            |
|                                 | $AUC_{0-inf}$ (h*ng/mL) | 171 (94.0)                | 74.0 (99.5)            | 235.8                 | 216.7            | 256.5            |
|                                 | $t_{1/2}$ (h)           | 5.00 (79.7)               | 2.95 (57.2)            | 153.0                 | 138.3            | 169.3            |
| $(\alpha+\beta)$ -HTBZ          | $C_{max}$ (ng/mL)       | 74.6 (37.1)               | 61.6 (38.2)            | 121.7                 | 106.3            | 139.2            |
|                                 | $AUC_{0-t}$ (h*ng/mL)   | 529.5 (53.9)              | 254.7 (70.7)           | 222.5                 | 206.0            | 240.3            |
|                                 | $AUC_{0-inf}$ (h*ng/mL) | 542 (53.8)                | 261 (69.6)             | 222.2                 | 205.9            | 239.7            |
|                                 | $t_{1/2}$ (h)           | 8.62 (38.2)               | 4.82 (50.8)            | 188.0                 | 167.4            | 211.1            |

Table S2. AUC<sub>0-t</sub> values for inactive and active metabolites in Study AUS-SD-809-CTP-06

|                                   |        | Inactive metabolites          |                                |                              |                               | Total ODM | Active metabolites               | Ratio <sup>a</sup> |
|-----------------------------------|--------|-------------------------------|--------------------------------|------------------------------|-------------------------------|-----------|----------------------------------|--------------------|
|                                   |        | 9-0-desmethyl- $\alpha$ -HTBZ | 10-0-desmethyl- $\alpha$ -HTBZ | 9-0-desmethyl- $\beta$ -HTBZ | 10-0-desmethyl- $\beta$ -HTBZ |           | Total ( $\alpha$ + $\beta$ )HTBZ |                    |
| Deutetrabenazine-treated Subjects | N      | 14                            | 14                             | 14                           | 14                            | 14        | 14                               | 14                 |
|                                   | Mean   | 21.00                         | 0                              | 92.40                        | 0.68                          | 114.10    | 443.01                           | 0.29               |
|                                   | CV (%) | 37                            | 0                              | 30                           | 111                           | 29        | 49                               | 34                 |
|                                   |        |                               |                                |                              |                               |           |                                  |                    |
| Tetrabenazine-treated Subjects    | N      | 14                            | 14                             | 14                           | 14                            | 14        | 14                               | 14                 |
|                                   | Mean   | 42.50                         | 0                              | 205                          | 2.97                          | 250.15    | 195.55                           | 1.50               |
|                                   | CV (%) | 47                            | 0                              | 33                           | 46                            | 34        | 55                               | 39                 |
|                                   |        |                               |                                |                              |                               |           |                                  |                    |

<sup>a</sup>Ratio of inactive to active metabolites

Table S3. Geometric mean values (Geometric CV%) of pharmacokinetic parameters for deuterated and non-deuterated total ( $\alpha + \beta$ ),  $\alpha$  and  $\beta$  dihydrotetrabenazine metabolites and downstream O-desmethyl dihydrometabolites from Study SD-809 C12

| PK Parameter <sup>a</sup>               | Dihydrotetrabenazine Analytes            |                                      |                                         |                                      |
|-----------------------------------------|------------------------------------------|--------------------------------------|-----------------------------------------|--------------------------------------|
|                                         | d6- $\alpha$ -HTBZ<br>(n = 6)            | $\alpha$ -HTBZ<br>(n = 6)            | d6- $\beta$ -HTBZ<br>(n = 6)            | $\beta$ -HTBZ<br>(n = 6)             |
| T <sub>lag</sub> (h) <sup>b</sup>       | 0.33 (0.00-0.33)                         | 0.33 (0.00-0.67)                     | 0.33 (0.33-0.67)                        | 0.50 (0.33-1.00)                     |
| T <sub>max</sub> (h) <sup>b</sup>       | 1.50 (0.67-4.00)                         | 1.50 (0.67-3.00)                     | 1.50 (1.00-4.00)                        | 1.50 (0.67-2.50)                     |
| C <sub>max</sub> (ng/mL)                | 27.5 (26)                                | 17.6 (52)                            | 16.8 (49)                               | 6.62 (77)                            |
| AUC <sub>0-t</sub> (ng*h/mL)            | 454 (45)                                 | 109 (28)                             | 177 (110)                               | 24.2 (50)                            |
| t <sub>1/2</sub> (h)                    | 12.2 (28) [n = 5]                        | 5.68 (44) [n = 4]                    | 9.2 (50)                                | 3.2 (16) [n = 2]                     |
| MRT <sub>0-t</sub> (h)                  | 17.4 (38)                                | 7.14 (46)                            | 10.4 (47)                               | 3.69 (32)                            |
| O-Desmethyl Dihydrometabolites Analytes |                                          |                                      |                                         |                                      |
| PK Parameter <sup>a</sup>               | d3-9-O-desmethyl- $\alpha$ -HTBZ (n = 6) | 9-O-desmethyl- $\alpha$ -HTBZ(n = 6) | d3-9-O-desmethyl- $\beta$ -HTBZ (n = 6) | 9-O-desmethyl- $\beta$ -HTBZ (n = 6) |
| T <sub>lag</sub> (h) <sup>b</sup>       | 1.25 (0.33-4.02)                         | 0.50 (0.33-1.50)                     | 0.84 (0.33-1.50)                        | 0.50 (0.33-1.50)                     |
| T <sub>max</sub> (h) <sup>b</sup>       | 5.00 (1.00-12.02)                        | 2.50 (1.00-6.00)                     | 7.00 (1.00-18.00)                       | 2.25 (1.00-8.00)                     |
| C <sub>max</sub> (ng/mL)                | 0.85 (17)                                | 2.73 (45)                            | 2.48 (20)                               | 8.03 (52)                            |
| AUC <sub>0-t</sub> (ng*h/mL)            | 12.6 (29)                                | 32.5 (33)                            | 83.1 (16)                               | 160 (16)                             |
| MRT <sub>0-t</sub> (h)                  | 10.5 (16)                                | 9.77 (23)                            | 22.7 (23)                               | 20.3 (35)                            |

<sup>a</sup>Non-radioactive bioanalytical assay results; <sup>b</sup>median (range)

Figure S1.  $AUC_{0-inf}$  and  $C_{max}$  following single dose administration of tetrabenazine (25 mg) and deutetrabenazine (25 mg) (all evaluable subjects, n = 19)

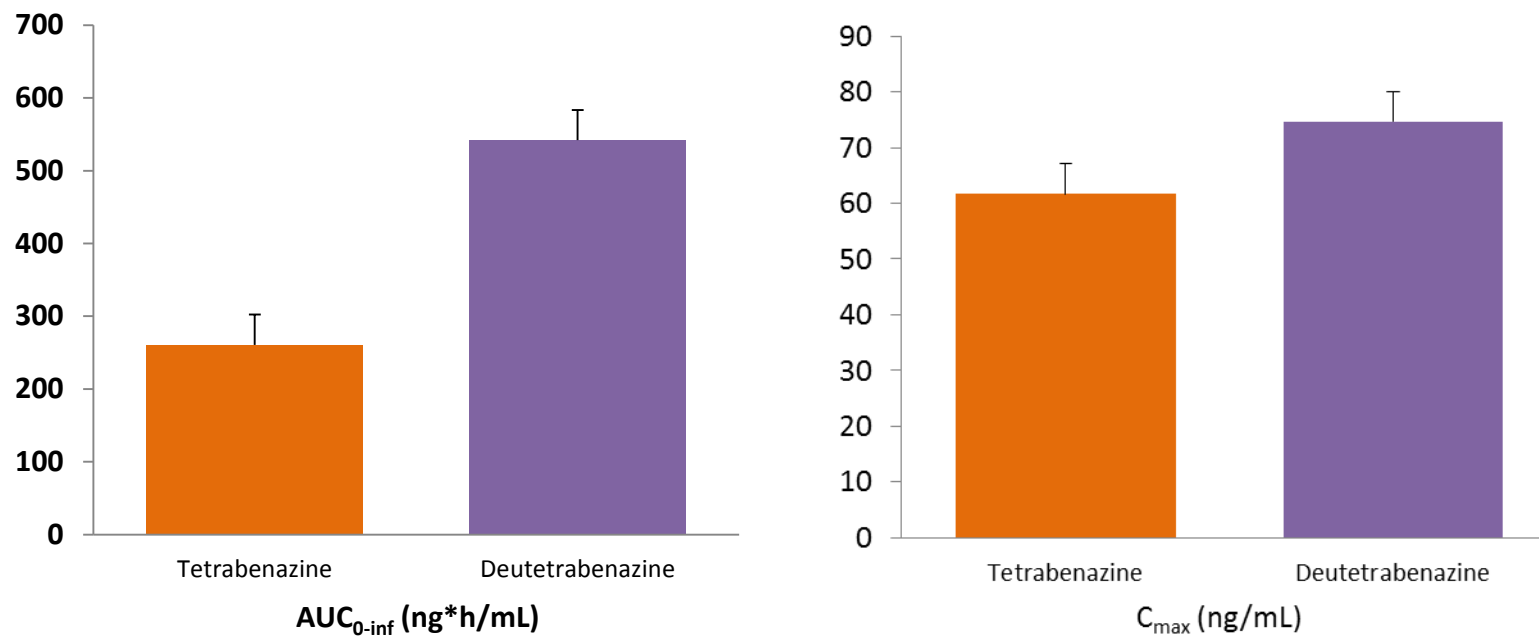

Figure S2. Radioactive chromatograms

Following administration of either [14C]-deutetrabenzazine or [14C]-tetrabenzazine, six metabolites were observed in the plasma samples analysed, each accounting for at least 10% of the sample radioactivity in at least one individual, or in the pooled samples during the course of the metabolite profiling analyses.

Figure S2A. Radiochromatogram of an AUC pooled plasma samples from subjects treated with [14C]-deutetrabenzazine

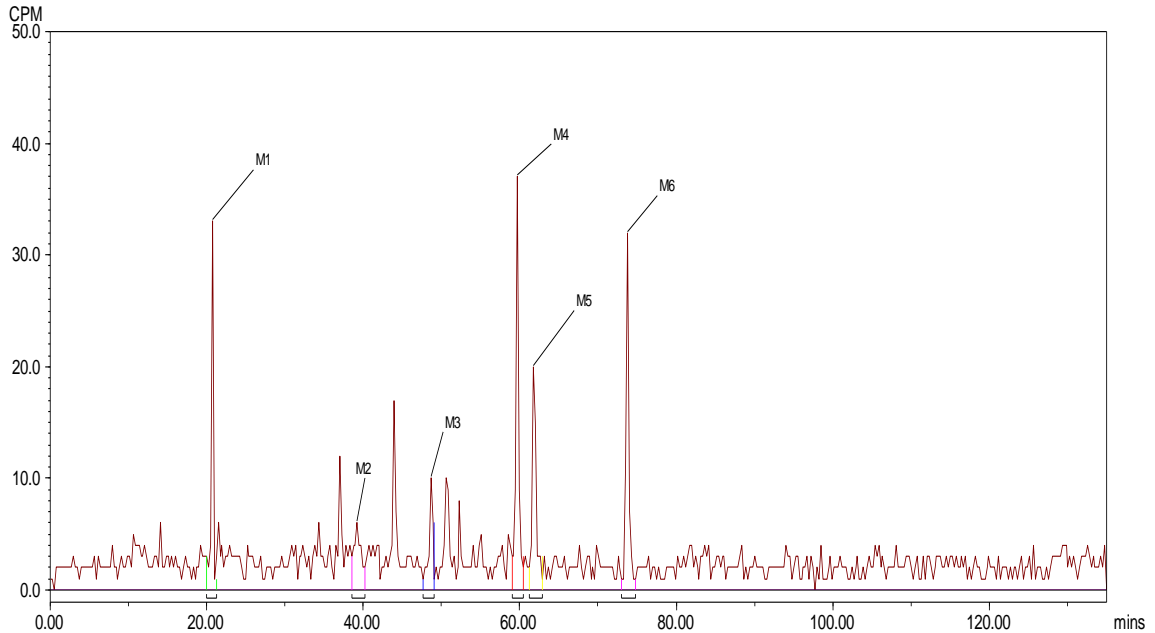

Figure S2B. Radiochromatogram of an AUC pooled plasma samples from subjects treated with [14C]-tetrabenzazine

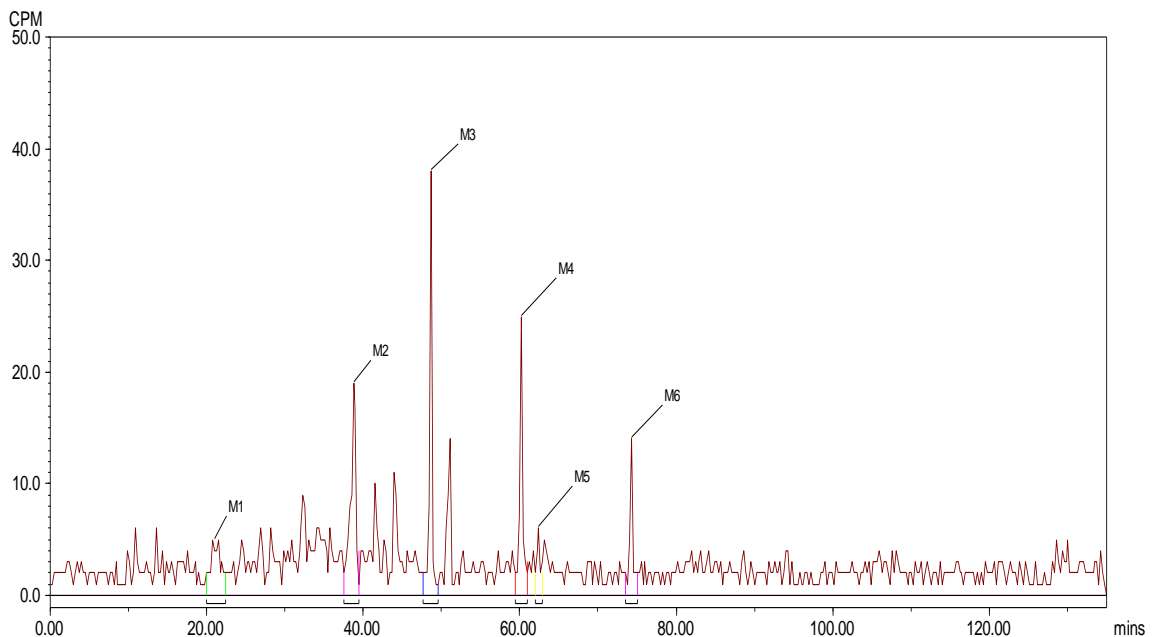

These plasma metabolites were subsequently identified as: M1 (2-methylpropanoic acid metabolite of  $\beta$ -HTBZ [originally identified as a carboxylic acid]); M2 (sulphate conjugate of O-desmethyl  $\beta$ -HTBZ); M3 (sulphate conjugate of O-desmethyl  $\alpha$ -HTBZ); M4 (mono-hydroxy metabolite of parent (deutetrabenzazine or tetrabenzazine)); M5 ( $\beta$ -HTBZ) and M6 ( $\alpha$ -HTBZ)

Figure S3. Radioactive chromatograms of urine samples

In the urine, five metabolites were observed, each accounting for at least 10% of the sample radioactivity. These urinary metabolites were subsequently identified as:

- U1 2-methylpropanoic acid metabolite of  $\beta$ -HTBZ [originally identified as a carboxylic acid]
- U2 mono-hydroxy  $\beta$ -HTBZ
- U3 sulphate conjugate of O-desmethyl  $\beta$ -HTBZ
- U4 co-elution of glucuronide of  $\alpha$ -HTBZ, sulphate conjugate of O-desmethyl HTBZ and monohydroxy $\alpha$ -HTBZ
- U5 sulphate conjugate of O-desmethyl  $\alpha$ -HTBZ

Figure S3A. Radioactive chromatogram of a 0-72 hour pooled urine sample obtained from subjects treated with [ $^{14}$ C]-deutetrabenazine

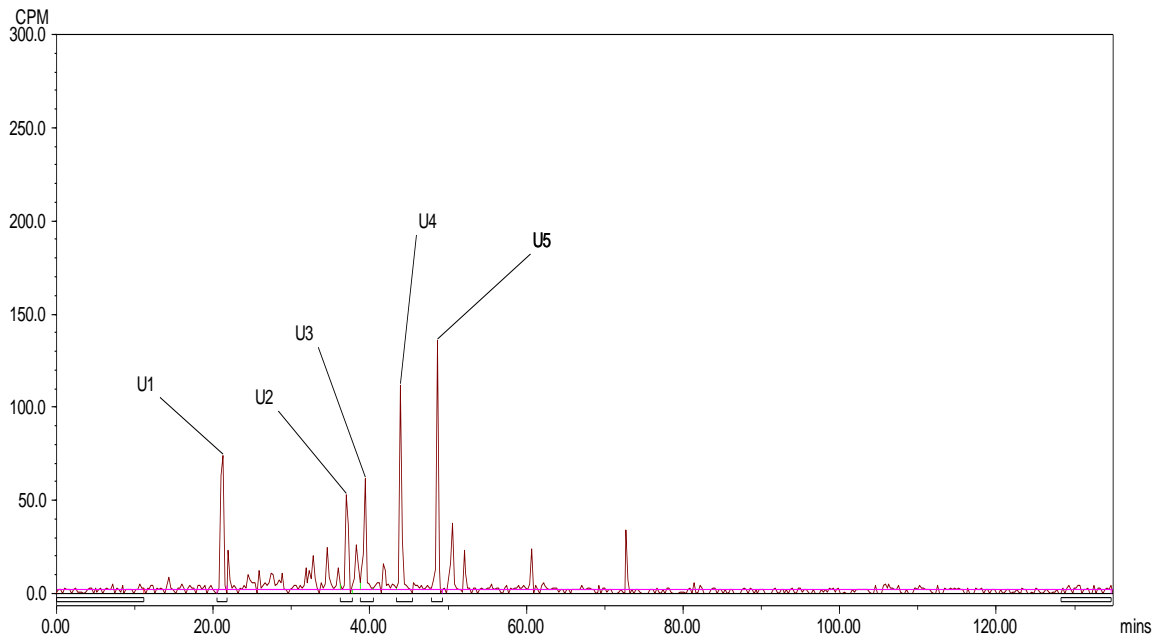

Figure S3B. Radioactive chromatogram of a 0-72 hour pooled urine sample obtained from subjects treated with [ $^{14}$ C]-tetrabenazine

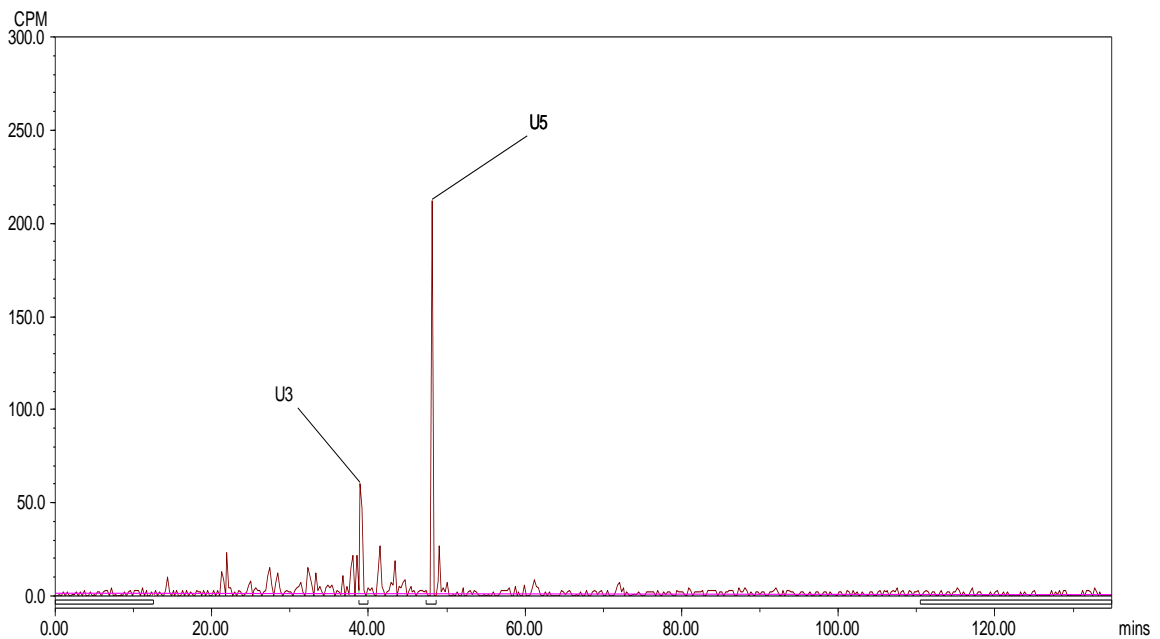

Supplement: CTS-13-707-s001.pdf [file CTS-13-707-s001.pdf]
